# Supplementary figures and images for: Sleep spindles mediate hippocampal-neocortical coupling during long-duration ripples
Source: eLife journal article supplement (doi:10.7554/elife.57011), 2020-07-13

**A**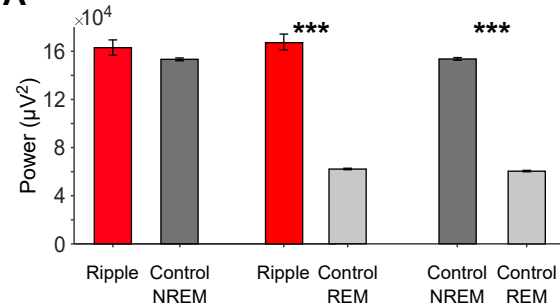**B**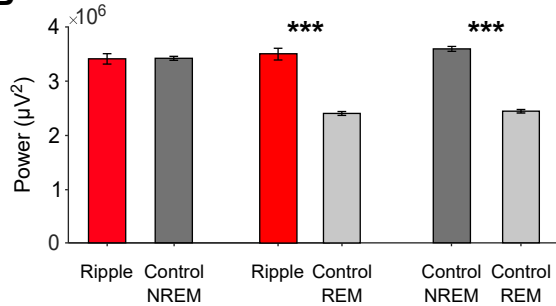

Supplement: supp [file elife-57011-supp-v1.zip]

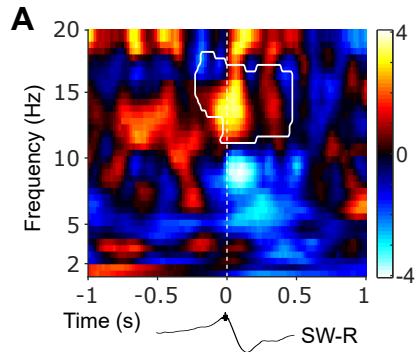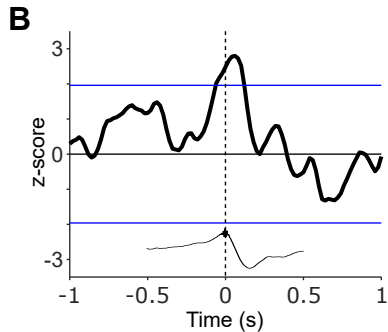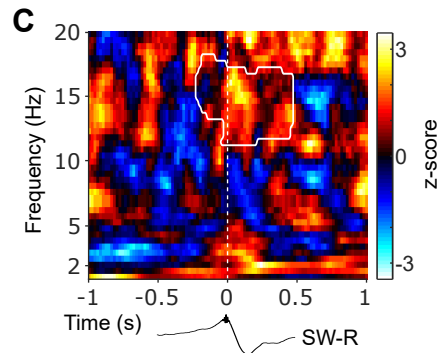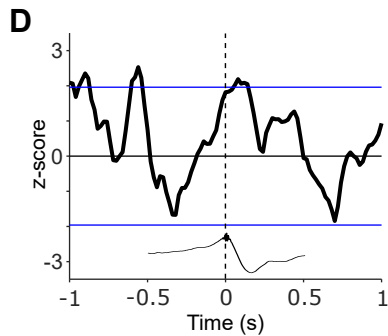

Supplement: supp [file elife-57011-supp-v1.zip]

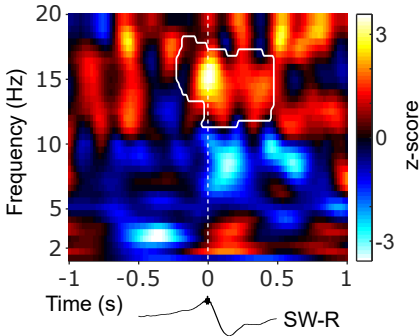

Supplement: supp [file elife-57011-supp-v1.zip]

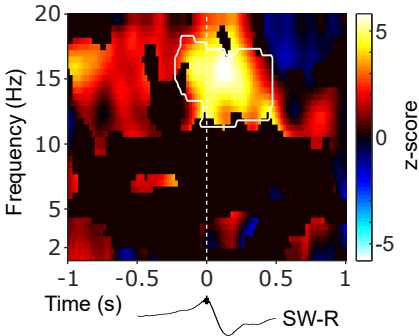

Supplement: supp [file elife-57011-supp-v1.zip]
